# Supplementary material
Source: MDPI journal article supplement (https://www.mdpi.com/2073-4344/12/10/1194)
Supplement: s1 [file s1]

# Improved the Light Adsorption and Separation of Charge Carriers to Boost Photocatalytic Conversion of CO<sub>2</sub> by Using Silver Doped ZnO Photocatalyst

Pham Thi Thu Hoai <sup>1,\*</sup>, Nguyen Thi Mai Huong <sup>1</sup>, Pham Thi Huong <sup>2,\*</sup> and Nguyen Minh Viet <sup>3</sup>

<sup>1</sup> Faculty of Food Technology, University of Economics—Technology for Industries (UNETI), Hanoi 11622, Vietnam

<sup>2</sup> Department of Materials Science and Engineering, Gachon University, 1342 Seongnam-daero, Seongnam 13120, Korea

<sup>3</sup> VNU Key Laboratory of Advanced Material for Green Growth, Faculty of Chemistry, VNU University of Science, 334 Nguyen Trai Street, Hanoi 114000, Vietnam

\* Correspondence: ptthoai@uneti.edu.vn (P.T.T.H.); phambary@gachon.ac.kr (P.T.H.)

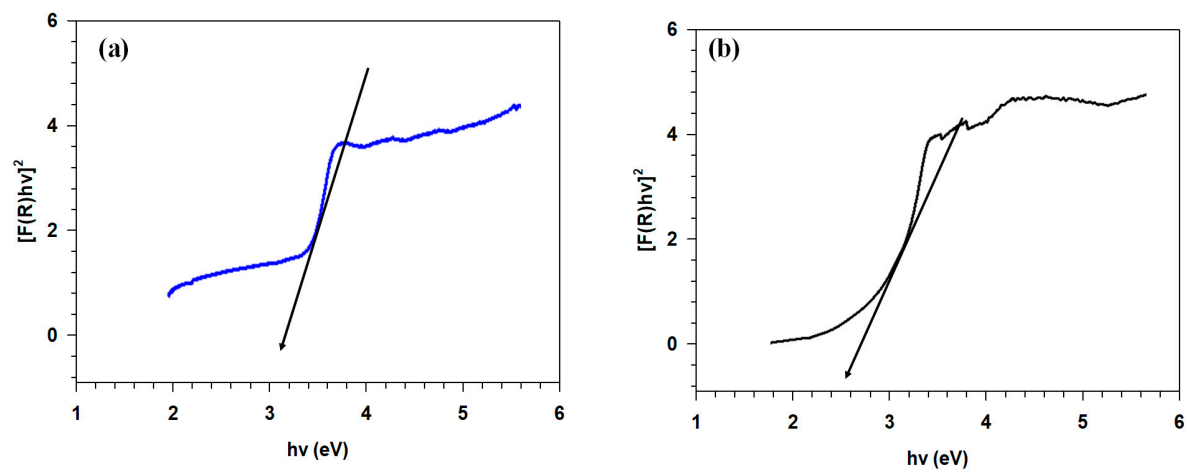

**Figure S1. Tauc plot of (a) ZnO and (b) Ag-ZnO.**

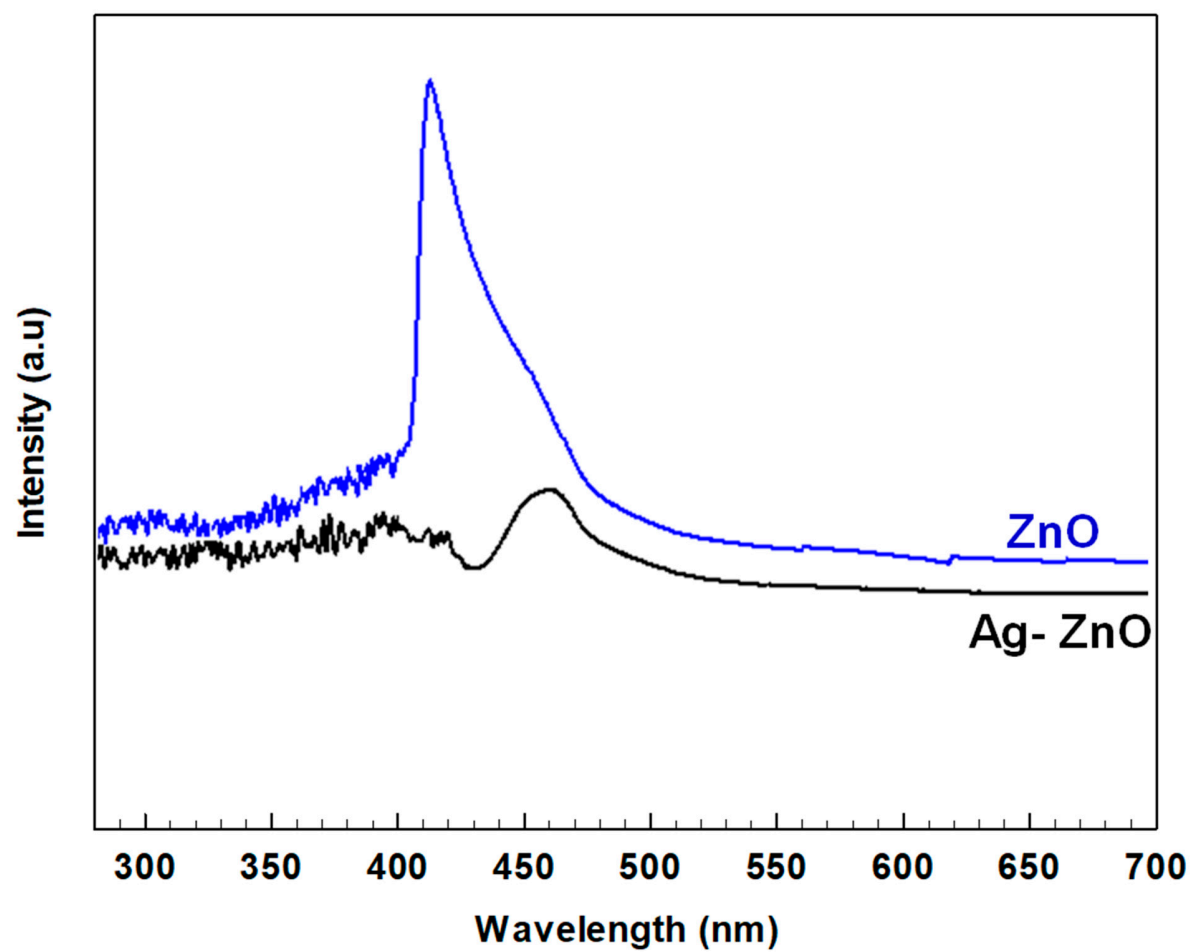

Figure S2. Photoluminescence analysis of ZnO and Ag-ZnO.

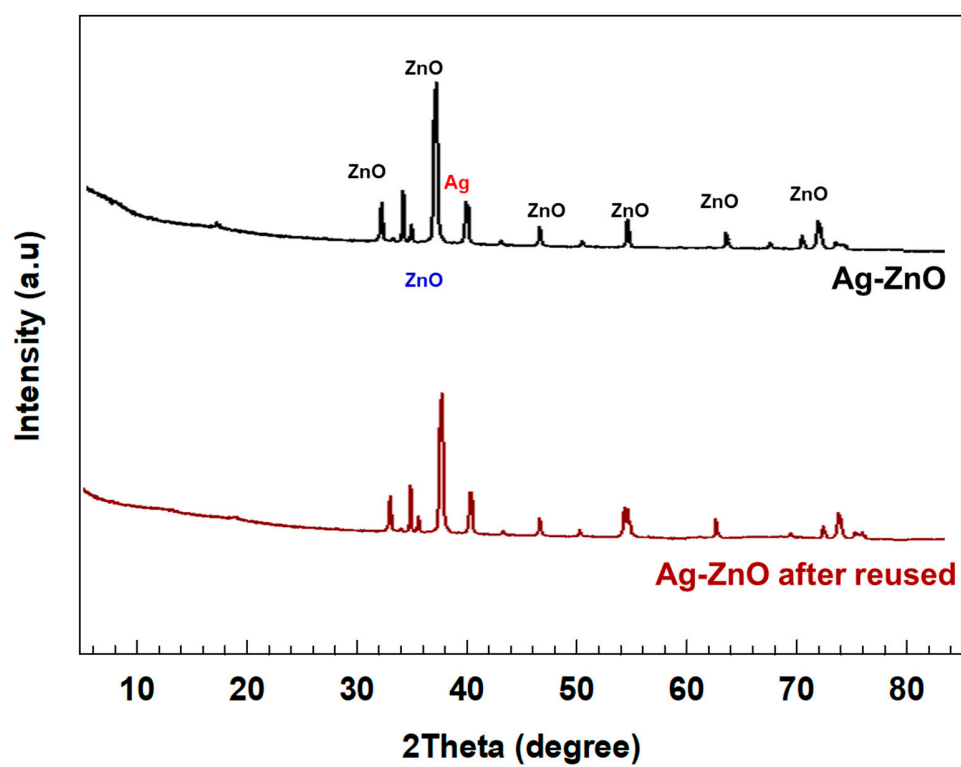

Figure S3. XRD patterns of Ag-ZnO and reused Ag-ZnO photocatalysts.

**Table S1.** The photocatalytic CO<sub>2</sub> conversion of different photocatalysts.

| <b>Materials</b>                                                    | <b>CO<br/>(<math>\mu\text{mol g}^{-1} \text{h}^{-1}</math>)</b> | <b>CH<sub>4</sub><br/>(<math>\mu\text{mol g}^{-1} \text{h}^{-1}</math>)</b> | <b>Ref.</b> |
|---------------------------------------------------------------------|-----------------------------------------------------------------|-----------------------------------------------------------------------------|-------------|
| <b>ZnO/g-C<sub>3</sub>N<sub>4</sub></b><br>(UV light)               | 38.7                                                            | 5                                                                           | [34]        |
| <b>Cu-TiO<sub>2</sub></b><br>(UV light)                             | 763                                                             | 18                                                                          | [35]        |
| <b>Cu/g-C<sub>3</sub>N<sub>4</sub></b><br>(UV light)                | 10.2                                                            | -                                                                           | [36]        |
| <b>Au@CdS/TiO<sub>2</sub></b><br>(UV light)                         | 41.6                                                            | 0.6                                                                         | [37]        |
| <b>Ag-ZnO/g-C<sub>3</sub>N<sub>4</sub></b><br>(UV light)            | 36                                                              | 14                                                                          | [38]        |
| <b>Pt<sup>2+</sup>-Pt<sup>0</sup>/TiO<sub>2</sub></b><br>(UV light) | 55                                                              | 64                                                                          | [39]        |
| <b>ZnO</b><br>(Solar light)                                         | 3.2                                                             | 0.56                                                                        | This study  |
| <b>Ag-ZnO</b><br>(Solar light)                                      | 9.8                                                             | 2.4                                                                         | This study  |

## References

- 34 He, Y.; Wang, Y.; Zhang, L.; Teng, B.; Fan, M. High-efficiency conversion of CO<sub>2</sub> to fuel over ZnO/g-C<sub>3</sub>N<sub>4</sub> photocatalyst. *Appl. Catal. B: Environ.* **2015**, 168–169, 1–8.
- 35 Tahir, M.; Tahir, B. Dynamic photocatalytic reduction of CO<sub>2</sub> to CO in a honeycomb monolith reactor loaded with Cu and N doped TiO<sub>2</sub> nanocatalysts. *Appl. Surf. Sci.* **2016**, 377, 244–252.
- 36 Sun, Z.; Fang, W.; Zhao, L.; Wang, H. 3D porous Cu-NPs/g-C<sub>3</sub>N<sub>4</sub> foam with excellent CO<sub>2</sub> adsorption and Schottky junction effect for photocatalytic CO<sub>2</sub> reduction. *Appl. Surf. Sci.* **2020**, 504, 144347.
- 37 Wei, Y.; Jiao, J.; Zhao, Z.; Liu, J.; Li, J.; Jiang, G.; Wang, Y.; Duan, A. Fabrication of inverse opal TiO<sub>2</sub>-supported Au@CdS core-shell nanoparticles for efficient photocatalytic CO<sub>2</sub> conversion. *Appl. Catal. B: Environ.* **2015**, 179, 422–432.
- 38 Arif, U.; Ali, F.; Bahader, A.; Ali, S.; Zada, A.; Raziq, F. Efficient visible light activities of Ag modified ZnO/g-C<sub>3</sub>N<sub>4</sub> composite for CO<sub>2</sub> conversion. *Inorg. Chem. Commun.* **2022**, 145, 109944. <https://doi.org/10.1016/j.inoche.2022.109944>.
- 39 Xiong; Wang, H.; Xu, N.; Li, H.; Fang, B.; Zhao, Y.; Zhang, J.; Zheng, C. Photocatalytic reduction of CO<sub>2</sub> on Pt<sup>2+</sup>-Pt<sup>0</sup>/TiO<sub>2</sub> nanoparticles under UV/Vis light irradiation: A combination of Pt<sup>2+</sup> doping and Pt nanoparticles deposition. *Int. J. Hydrog. Energy*, **2015**, 40, 10049–10062.
